# Supplementary material for: Quality assessment of the registration of vulvar and vaginal premalignant lesions at the Cancer Registry of Norway
Source: PubMed Central journal article supplement (PMC3251004; doi:10.3109/0284186x.2011.624545), 2011-11-02
Supplement: 624545_suppl.pdf [file 624545_suppl.pdf]

Supplementary material for Espen Enerly et al., Quality assessment of the registration of vulvar and vaginal premalignant lesions at the Cancer Registry of Norway, *Acta Oncologica*, 2012;51:45–50.

Supplementary Table I. Distribution of topography codes used by Pathology laboratories and Cancer Registry of Norway (CRN) for notifications not received from laboratories during reabstraction.

| From pathology laboratories <sup>a</sup> | From CRN <sup>b</sup> |        |
|------------------------------------------|-----------------------|--------|
|                                          | Vulva                 | Vagina |
| Vulva                                    | 277                   | 4      |
| Vagina                                   | 12                    | 39     |
| Skin                                     | 183                   | 1      |
| Cervix                                   | 8                     | 9      |
| Other <sup>c</sup>                       | 14                    | 4      |
| NA <sup>d</sup>                          | 20                    | 2      |
| Total                                    | 514                   | 59     |

<sup>a</sup>SNOMED topography codes are replaced by corresponding topography descriptions.

<sup>b</sup>ICD-O-2 topography codes are replaced by corresponding topography descriptions.

<sup>c</sup>Anus, uterus, perineum, endometrium and urethra.

<sup>d</sup>Not available, No SNOMED code on the notification.

Supplementary Table II. Comparison of topography coding between original and reabstracted Cancer Registry of Norway (CRN) codes.

|                                           | Reabstracted codes |                    |                              |           |        |        |
|-------------------------------------------|--------------------|--------------------|------------------------------|-----------|--------|--------|
|                                           | Vulva Labium majus | Vulva Labium minus | Vulva NOS labium majus/minus | Vulva NOS | Vagina | Cervix |
| <b>Original codes</b>                     |                    |                    |                              |           |        |        |
| Vulva Labium majus                        | 9                  |                    |                              | 8         |        |        |
| Vulva Labium minus                        |                    | 22                 |                              | 12        |        |        |
| Vulva NOS <sup>a</sup> labium majus/minus |                    |                    | 1                            | 1         |        |        |
| Vulva NOS                                 | 4                  | 12                 |                              | 561       | 5      | 2      |
| Vagina                                    |                    |                    |                              | 2         | 121    |        |
| Cervix                                    |                    |                    |                              | 3         | 44     |        |
| Others <sup>b</sup>                       |                    |                    |                              | 5         | 2      |        |

Discrepancies between original code and reabstracted code are highlighted in light gray (minor discrepancy) and dark gray (major discrepancy). ICD-O-2 topography codes are replaced by corresponding topography descriptions.

<sup>a</sup>Not otherwise specified.

<sup>b</sup>Skin, anus, urethra and corpus uteri.

Supplementary Table III. Comparison of morphology coding between original and reabstracted Cancer Registry of Norway (CRN) codes.

| Original codes                     | Reabstracted codes |         |         |         |         |         |         |         |                     |                       |
|------------------------------------|--------------------|---------|---------|---------|---------|---------|---------|---------|---------------------|-----------------------|
|                                    | 8077/29            | 8070/29 | 7063/19 | 7062/19 | 7069/19 | 7231/29 | 7060/19 | 8081/29 | Carcinoma<br>in SEC | Mild atypia<br>in SEC |
| 8077/29                            | 478                | 5       | 2       |         | 2       | 10      |         |         | 1                   |                       |
| 8070/29                            | 8                  | 92      |         | 1       | 2       |         |         |         |                     |                       |
| 7063/19                            | 10                 | 2       | 81      | 1       | 3       |         |         |         |                     |                       |
| 7062/19                            | 3                  | 1       |         | 32      | 3       | 4       |         |         |                     |                       |
| 7069/19                            | 3                  | 3       |         | 1       | 30      | 1       | 1       |         | 1                   |                       |
| 7231/29                            | 2                  |         |         |         |         |         |         |         |                     |                       |
| 7060/19                            |                    |         |         |         | 2       |         |         |         |                     |                       |
| 7032/19                            |                    |         |         |         |         |         |         |         |                     | 1                     |
| 7033/19                            |                    |         | 1       |         |         |         |         |         |                     |                       |
| 8140/29                            |                    |         |         |         | 1       |         |         |         |                     |                       |
| 8001/19                            |                    |         |         |         | 1       |         |         |         |                     |                       |
| 8081/29                            |                    | 1       |         |         |         |         |         | 11      |                     |                       |
| Carcinoma <sup>a</sup>             | 7                  |         | 1       |         | 1       |         |         |         |                     |                       |
| Mild atypia<br>in SEC <sup>b</sup> |                    |         |         | 1       | 2       | 1       |         |         |                     |                       |

Discrepancies between original code and reabstracted code are highlighted in light gray (minor discrepancy) and dark gray (major discrepancy). Code descriptions of codes used at CRN: 807729 (VIN3 or VaIN3), 807029 (Squamous cell carcinoma *in situ*), 706319 (Severe atypia/dysplasia in squamous epithelial cells), 706219 (Moderate atypia/dysplasia in squamous epithelial cells), 706919 (Atypia/dysplasia in squamous epithelial cells, NOS, precancerous), 723129 (High grade squamous intraepithelial lesion HSIL, VIN 2/3 or VaIN2/3), 706019 (Irregular squamous epithelium, uncertain atypia), 703219 (Moderate atypia/dysplasia in glandular epithelium), 703319 (Severe atypia/dysplasia in glandular epithelial cells), 814029 (Adenocarcinoma *in situ*), 800119 (Suspect malignant cells), 808129 (Bowen disease).

<sup>a</sup>Basaloid carcinoma, squamous cell carcinoma, microinvasive squamous cell carcinoma.

<sup>b</sup>Squamous epithelial cells.
